# Supplementary material
Source: PubMed Central journal article supplement (PMC5426990)

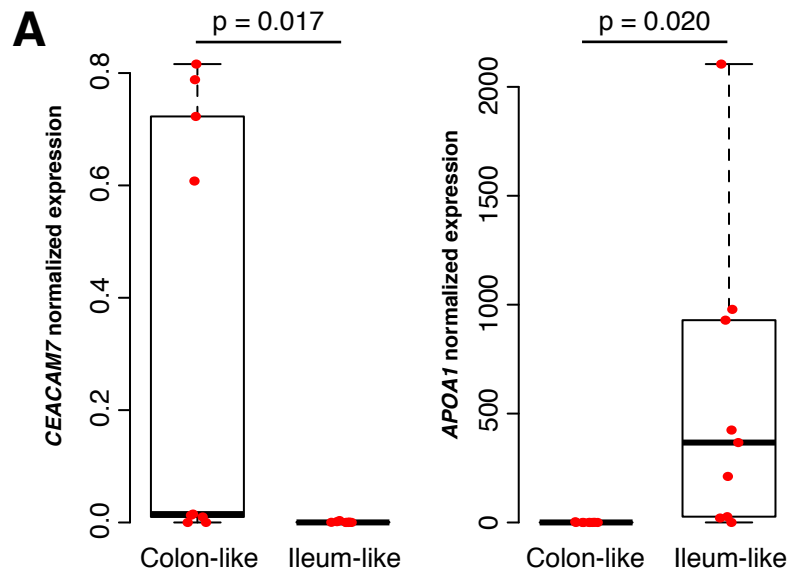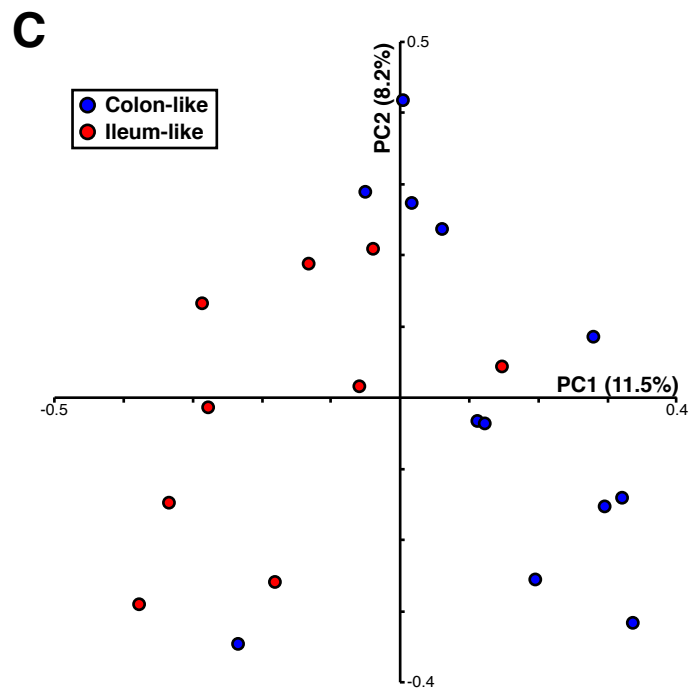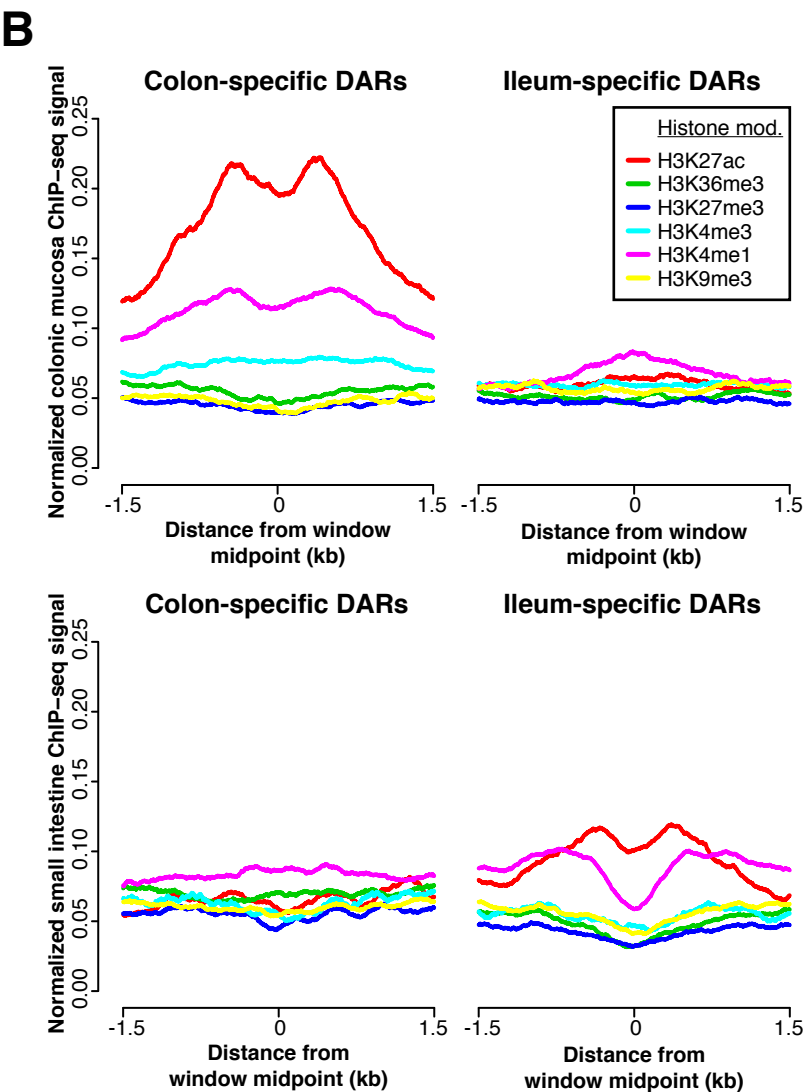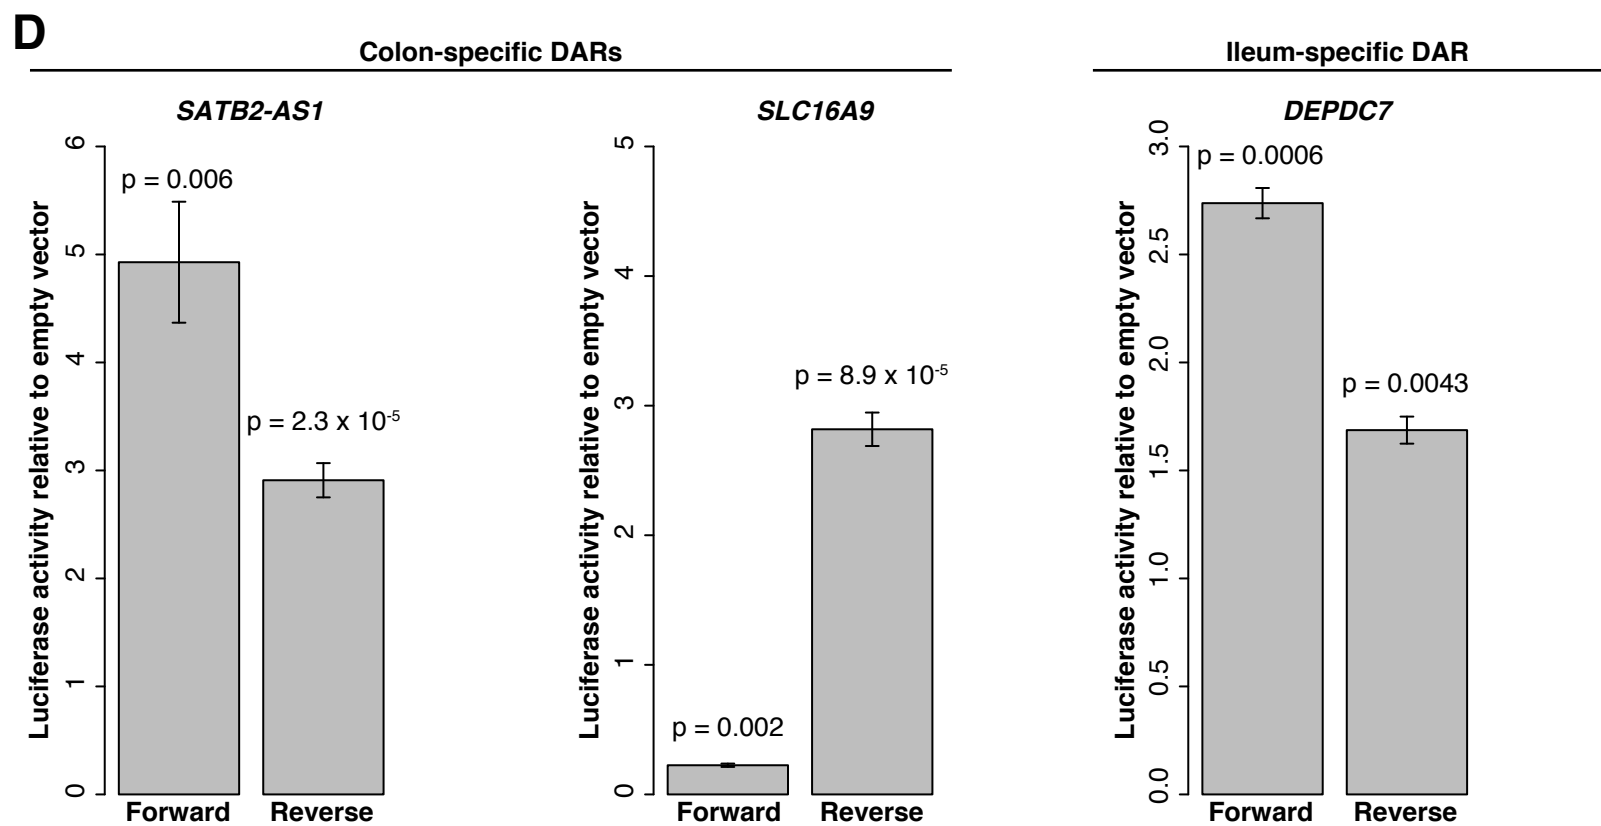

Supplement: NIHMS856544-supplement-Sup_Fig_1.pdf [file NIHMS856544-supplement-Sup_Fig_1.pdf]
