# Supplementary material
Source: PubMed Central journal article supplement (PMC5426990)

**A****Adult (colon)**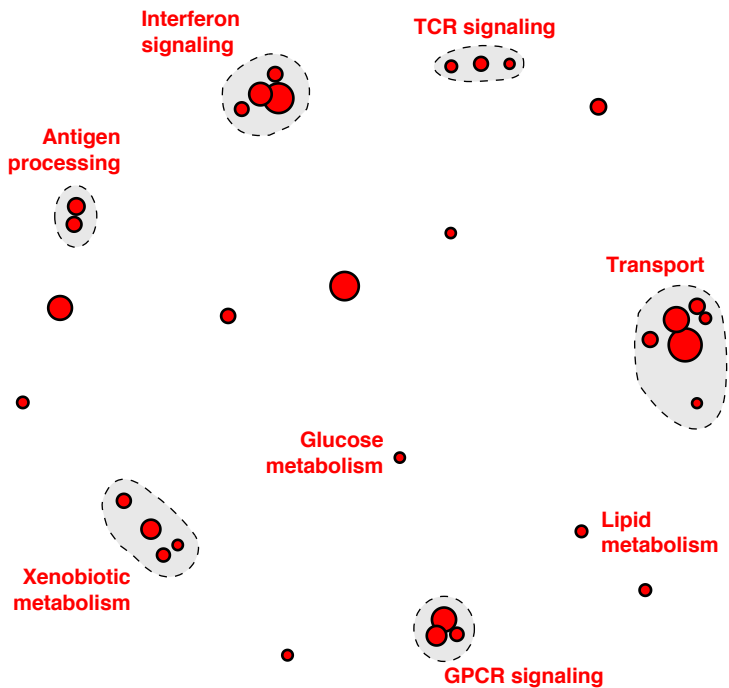**B****Pediatric (ileum)**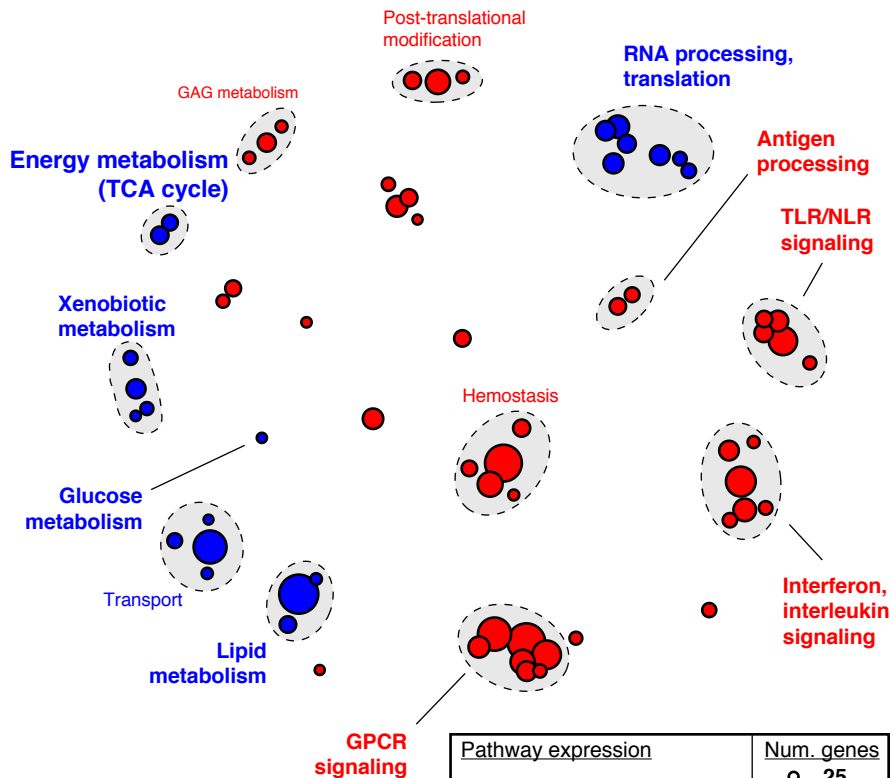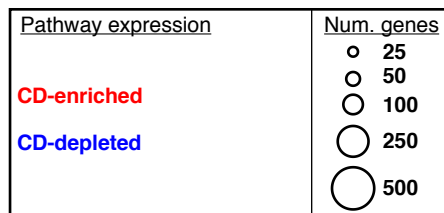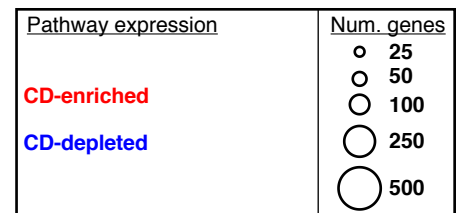

Supplement: NIHMS856544-supplement-Sup_Fig_3.pdf [file NIHMS856544-supplement-Sup_Fig_3.pdf]
